# Supplementary material for: Impact of Carnivory on Human Development and Evolution Revealed by a New Unifying Model of Weaning in Mammals
Source: PubMed Central journal article supplement (PMC3329511; doi:10.1371/journal.pone.0032452), 2012-04-18

Sample characteristics per mammalian order, N=67

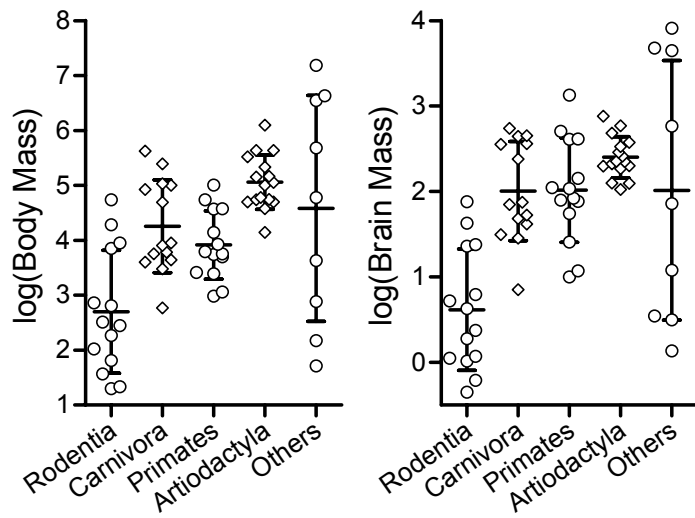

Supplement: pone.0032452.s005.pdf [file pone.0032452.s005.pdf]
