# Supplementary material for: Impact of Carnivory on Human Development and Evolution Revealed by a New Unifying Model of Weaning in Mammals
Source: PubMed Central journal article supplement (PMC3329511; doi:10.1371/journal.pone.0032452), 2012-04-18

Primates in present sample only, N=14

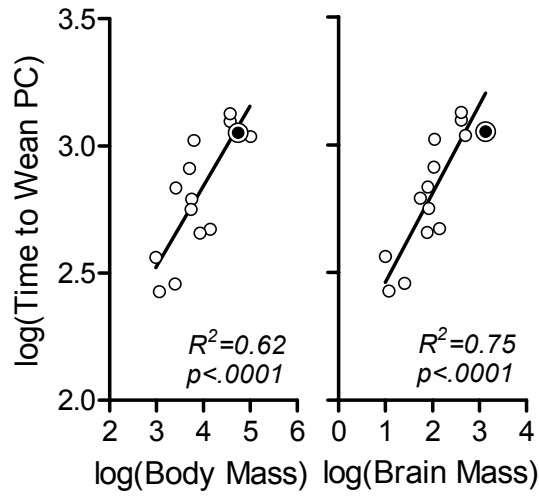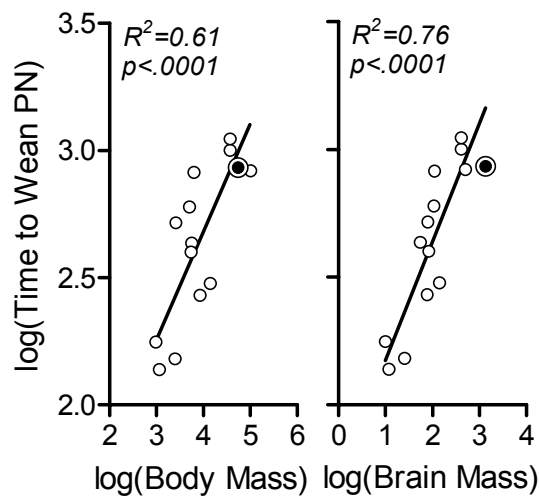

Supplement: pone.0032452.s008.pdf [file pone.0032452.s008.pdf]
